# Lineage and stage-specific expressed *CYCD7;1* coordinates the single symmetric division that creates stomatal guard cells

Annika K. Weimer<sup>1,6</sup>, Juliana L. Matos<sup>1,2,6</sup>, Nidhi Sharma<sup>3</sup>, Farah Patell<sup>4,5</sup>, James A.H. Murray<sup>4,5</sup>, Walter Dewitte<sup>4,5</sup>, Dominique C. Bergmann<sup>1,3\*</sup>

<sup>1</sup> Department of Biology, Stanford University, Stanford, CA, USA

<sup>2</sup> Present address: University of California Berkeley, Innovative Genomics Institute; Department of Plant and Microbial Biology, Berkeley, CA, USA

<sup>3</sup> Howard Hughes Medical Institute (HHMI), Stanford University, Stanford, CA, USA

<sup>4</sup> Cardiff School of Bioscience, Cardiff University, Wales, United Kingdom

<sup>5</sup> Institute of Biotechnology, University of Cambridge, United Kingdom

<sup>6</sup> These authors contributed equally to this work.

\* Author for correspondence: dbergmann@stanford.edu

**Keywords:** stomatal development, cell cycle, cyclin, cell division, differentiation, guard cell

## Summary statement:

The core cell cycle component, *CYCD7;1* requires stomatal transcription factors for its GMC-specific expression; *CYCD7;1* promotes the single symmetric division that ensures production of a 2-celled stomatal complex.

## Abstract

Plants, with cells fixed in place by rigid walls, often utilize spatial and temporally distinct cell division programs to organize and maintain organs. This leads to the question of how developmental regulators interact with the cell cycle machinery to link cell division events with particular developmental trajectories. In *Arabidopsis* leaves, the development of stomata, 2-celled epidermal valves that mediate plant-atmosphere gas exchange, relies on a series of oriented stem-cell-like asymmetric divisions followed by a single symmetric division. The stomatal lineage is embedded in a tissue whose other cells transition from proliferation to post-mitotic differentiation earlier, necessitating stomatal lineage-specific factors to prolong competence to divide. We show that the D-type cyclin, *CYCD7;1*, is specifically expressed just prior to the symmetric guard-cell forming division, and that it is limiting for this division. Further, we find that *CYCD7;1* is capable of promoting divisions in multiple contexts, likely through RBR-dependent promotion of the G1/S transition, but that *CYCD7;1* is regulated at the transcriptional level by cell-type specific transcription factors that confine its expression to the appropriate developmental window.

## Introduction

Development of multicellular organisms requires the coordination and control of cell proliferation with differentiation programs to generate distinct cell types, tissues and organs. Different cell lineages are specified by sets of developmental regulators and display various cell proliferation dynamics, suggesting that the cell cycle machinery might not always be comprised of the same components or controlled in the same way. In *Arabidopsis*, the mature leaf epidermis contains pavement cells, trichomes and stomata, three different functional cell types with their own developmental trajectories. In the past decade, genetic analyses of these cell types have enabled the discovery of various connections between cell cycle and development. For example, trichome precursors are specified early and patterned via lateral inhibition networks (Schellmann et al., 2002), and their maturation requires a shift from mitotic to

endoreplication programs (Bramsiepe et al., 2010). Pavement cells also endoreplicate as they acquire their lobed morphologies (Katagiri et al., 2016). Stomata, pivotal for gas exchange between the plant and the environment, are derived from protodermal cells in a process that requires them to first become self-renewing and multi-potent, but then to navigate an ordered set of divisions and differentiation programs to create the mature stoma (Matos and Bergmann, 2014).

Key transcriptional regulators of the stomatal lineage – the stage-specific, basic-helix loop-helix (bHLH) transcription factors, *SPEECHLESS* (*SPCH*), *MUTE* and *FAMA* and their broadly expressed heterodimer partners *SCRM/ICE1* and *SCRM2* (Kanaoka et al., 2008) – each have roles in both cell division and cell fate (Fig 1A). *SPCH* drives asymmetric cell divisions that initiate the lineage, creating meristemoids (*M*) that may undergo continued self-renewing divisions. Plants lacking *SPCH* have no stomatal lineage. *MUTE* is essential to terminate the asymmetric self-renewing divisions and to induce the differentiation of meristemoids into guard mother cells (*GMCs*) (MacAlister et al., 2007; Pillitteri et al., 2007); loss of *MUTE* results in excess meristemoids at the expense of *GMCs* (MacAlister et al., 2007; Pillitteri and Torii, 2007). *FAMA* is required for the establishment of *GCs* but also to restrict *GMCs* to a single division. *fama* mutants exhibit numerous rounds of symmetric and parallel *GMC* divisions without acquisition of terminal *GC* identities (Matos et al., 2014; Ohashi-Ito and Bergmann, 2006). Plants bearing mutations in two R2R3 MYB transcription factor genes *FOUR LIPS* (*FLP*) and *MYB88* also exhibit *fama*-like *GMC* over-proliferation phenotypes (Lai et al., 2005; Xie et al., 2010).

Presumably, among targets and partners of these transcription factors are cell cycle regulators that enable the diverse trajectories and division behaviors of epidermal cells. The components of the core cell cycle machinery are highly conserved among eukaryotes, though there has been a large expansion of genes in plants (Harashima et al., 2013; Inzé and De Veylder, 2006). The plant cell cycle is regulated by 5 main cyclin-dependent kinases (*CDKs*), *CDKA;1*, *CDKB1;1*, *CDKB1;2*, *CDKB2;1* and *CDKB2;2*. *CDKs* require cyclins (*CYC*) as binding partners for their kinase activity toward downstream phosphorylation targets. Plants genomes encode much larger families of cyclin genes than animals; for example, *Arabidopsis* encodes at least 32 cyclins (Vandepoele et al., 2002; Wang et al., 2004) and it has been speculated that this expansion allows plants to specifically regulate their postembryonic development (De Veylder et al., 2007; Harashima et al., 2013; Inzé and De Veylder, 2006). D-type cyclins as partners of *CDKA;1* are critical for the G1/S cell cycle transition and commitment to divide (Dewitte et al., 2007; Harbour and Dean, 2000; Riou-Khamlichi et al., 2000). Eight out of ten plant *CYCDs* have an RBR1-binding motif (LxCxE) (Kono et al., 2007; Menges et al., 2003). RBR1, the *Arabidopsis* homolog of the human tumor suppressor protein Retinoblastoma, is crucial for the negative control of the cell cycle at G1/S transition (Desvoyes et al., 2006; Gutzat et al., 2012; Nowack et al., 2012; Uemukai et al., 2005; Zhao et al., 2012). Phosphorylation of RBR1 by *CDKA;1/CYCD* complexes inactivates its suppression of E2F transcription factors, allowing entry into S phase and commitment to divide (Fig. 1B) (Harashima et al., 2013; Nakagami et al., 2002; Nowack et al., 2012; Umen and Goodenough, 2001).

Here we show how the cell cycle and cell fate transition from *GMCs* to *GCs* is regulated by the stomatal-lineage specific G1-S phase cell cycle regulator *CYCD7;1*. We demonstrate that *CYCD7;1* activity is that of a typical D-type cyclin, but its expression window is narrowed by stomatal lineage specific transcription factors. By examining how *CYCD7;1* works with the core cell-cycle machinery and with stomatal regulators, and by revealing the phenotypes upon loss and gain of *CYCD7;1* function, we link a core cell-cycle regulator with a specific differentiation process and show how a formative

division is initiated but also restricted to allow “one and only one division” in GMCs to create a physiologically functional valve structure from its two identical daughters.

## Results

### **CYCD7;1 is expressed prior to the last symmetric division in the stomatal lineage**

Among the 10 known D-type cyclins in *Arabidopsis*, *CYCD7;1* was uniquely enriched in transcriptional profiles of Fluorescence Activated Cell Sorting (FACS) isolated cells of the late stomatal lineage (Adrian et al., 2015). We confirmed this predicted expression in GMCs with transcriptional and translational reporters (Fig. 1C-E) and observed that additional copies of *CYCD7;1-YFP* could force ectopic divisions in GCs, suggesting that the protein could play a role in regulating this division (Fig. 1C, white arrowhead). A translational reporter, *pCYCD7;1:CYCD7;1-YFP*, was characterized previously as peaking in GMCs (Adrian et al., 2015); however, the identity of *CYCD7;1* expressing cells was only assessed by morphology. To refine the expression pattern, we co-expressed *pCYCD7;1:CYCD7;1-YFP* with CFP reporters for SPCH, MUTE and FAMA (Fig. 1F-N). SPCH-CFP and *CYCD7;1-YFP* expression appear to be mutually exclusive, suggesting that *CYCD7;1* is not expressed in young meristemoids (Fig. 1F-H). MUTE-CFP, a marker of late meristemoids and GMCs, partially overlaps with *CYCD7;1-YFP*. Closer analysis of cell morphologies indicated that cells expressing MUTE, but not *CYCD7;1* were meristemoids, never GMCs, suggesting that MUTE is expressed before *CYCD7;1* (Fig. 1I-K). When compared to FAMA expression, *CYCD7;1-YFP* is visible before FAMA-CFP in GMCs, and together with FAMA in newly divided GCs. FAMA, but not *CYCD7;1* persists into maturing GCs (Fig. 1L-N; (Ohashi-Ito and Bergmann, 2006)). Thus, the expression of *CYCD7;1*, in the stomatal lineage is temporally and spatially controlled. It commences after MUTE expression and is extinguished before the end of FAMA expression (Fig. 1A).

We did not observe expression of *CYCD7;1-YFP* in any vegetative tissue from the seedling stage through flowering (data not shown). In adult plants, *CYCD7;1-YFP* was expressed in pollen sperm cells at anthesis, but not in the vegetative nucleus (Fig. S1A, B). The expression of a D-type cyclin (typically expressed at G1/S) is consistent with the observations that sperm cells undergo an extended S phase in mature pollen grains (Friedman, 1999; Zhao et al., 2012).

Why does *CYCD7;1* have such a restricted expression pattern in the stomatal lineage? One possible explanation is that *CYCD7;1* has a unique function in GMC divisions. A second possibility is that *CYCD7;1* has a canonical role, i.e. it acts like other cyclins in promoting cell divisions, but it is important to be able to tightly control deployment of that role in the stomatal lineage. To distinguish between these models, we characterized plants missing or misexpressing *CYCD7;1*, tested relationships between *CYCD7;1* and other cell cycle regulators, and defined how *CYCD7;1* expression was constrained by stomatal lineage transcription factors.

### **Ectopic expression of *CYCD7;1* triggers divisions while *cycd7;1* mutants decelerate GMC divisions**

If *CYCD7;1* has canonical CYCD activity, it should be able to promote cell divisions outside its normal expression window. To test this, we expressed *CYCD7;1* and *CYCD7;1-YFP* with the pan-epidermal promoter, ML1 (Roeder et al., 2010). Ectopic expression of *CYCD7;1* (YFP-tagged or untagged) induced cell divisions of pavement cells in the leaf (Fig. 2A-D) indicating that *CYCD7;1* can function as a canonical D-type cyclin.

Next, we asked if mutations of *CYCD7;1* result in abnormal phenotypes. We obtained five insertional mutant alleles *CYCD7;1*: FLAG\_369E02 (*cycd7;1-1* (Collins et al., 2012), FLAG\_498H08 (*cycd7;1-2*), GK\_496G06-019628, SALK\_068526. Two of these alleles, *cycd7;1-1* and *cycd7;1-2* were outcrossed twice to Col-0 and we determined that neither produced transcript by qRT-PCR (Fig. S2B-C) in 6-day old seedlings. On a whole plant level, we could not detect any abnormalities in *cycd7;1-1* compared to wild type (Fig. S2D). Because CYCDs promote G1/S transitions and *CYCD7;1* is specifically expressed during the GMC divisions, we asked whether *cycd7;1-1* mutants halt the GMC to GC transition by counting the number of GCs in cotyledons. In maturing cotyledons 7 days after germination (dag), we count no difference in GC numbers between *cycd7;1-1* and wild type (Fig. S2E-G). However, when monitored at 4 dag, when the stomatal lineage is still proliferating and guard cell precursors (meristemoids and GMCs) are abundant, *cycd7;1-1* cotyledons have more GMCs compared to wild type cotyledons (Fig. 2E). This suggests that *cycd7;1-1* does not block the development of GCs from GMCs, but may be required to promote timely transition through the GMC stage. Interestingly, the average size of *cycd7;1-1* GMCs is larger than wild type (Fig. 2F). Plant cells are known to increase in size during G1, so this phenotype also suggests that *CYCD7;1* hastens cell cycle progression in the GMC to GC transition. We confirmed that these GMC abundance and size phenotypes were present in plants bearing the *cycd7;1-2* allele (Fig. S2C, H, I). Because *cycd7;1-1* and *cycd7;1-2* were originally in Wassilewskija (Ws) background and outcrossed to Col-0 twice, we tested whether any of the stomatal phenotypes were due to ecotype background effects. Quantification of GMC number and size revealed no significant differences between Ws and Col-0 indicating that the phenotype could be attributed to the *cycd7;1* mutations and not to ecotype differences (Fig. S2J,K).

We characterized the *cycd7;1-1* mutant in more detail. We introgressed *pCDKB1;1:GUS*, which labels the transition from GMC to GCs (Boudolf et al., 2004), into *cycd7;1-1* mutants. Compared to wild type, *cycd7;1-1* mutants show increased number of GUS-positive cells suggesting that these cells remain longer in GMC fate before they divide into GCs (Fig. 2G-I). To directly test this hypothesis, we labeled S phases with 5-ethynyl-2'-deoxyuridine (EdU) a thymidine analogue readily incorporated during DNA replication (Fig. 2J-L). Strikingly, significantly fewer GMCs in *cycd7;1-1* showed EdU labeling (indicating that they were in S phase during the EdU pulse) compared to wild-type GMCs (Fig. 2L). Together these data suggest that *CYCD7;1* is required for GMCs to make a timely entry into S phase before their transition into GCs.

### **CYCD7;1 interacts with RBR1**

Typically, CYCDs drive the G1/S transition through inactivation of RBR1, and RBR1 activity was previously shown to be essential for repressing divisions in the stomatal lineage (Borghini et al., 2010; Matos et al., 2014). If *CYCD7;1* and RBR1 function together, we would expect them to be co-expressed, to physically interact, and for there to be a phenotypic consequence of disrupting the interaction. Indeed, *CYCD7;1* and RBR1 were shown to physically interact in BIFC and Y2H assays, dependent on the presence of the RBR1 binding motif LxCxE in *CYCD7;1* (Matos et al., 2014). In addition, *CYCD7;1* and RBR1 are co-expressed in GMCs (Fig. 3A-C). To test whether this interaction is functionally important, we took advantage of the fact that our translational reporter of *CYCD7;1* triggers extra cell divisions in GCs (Fig. 1C, Fig. 3 D,E). Approximately 24% of GCs have one and 18% have two ectopic divisions in *pCYCD7;1:CYCD7;1-YFP* plants at 5 dag (Fig. 3G). If the RBR1 interaction is important for *CYCD7;1* function, then mutation of the RBR1 binding motif LxCxE into LxGxK in *CYCD7;1*, should abrogate this division-promoting activity. Strikingly, we found that



*pCYCD7;1:CYCD7;1<sup>LGK</sup>-YFP* no longer triggers ectopic cell divisions in GCs (Fig. 3F,G). This effect was not due to differences in expression levels between *CYCD7;1-YFP* and *CYCD7;1<sup>LGK</sup>-YFP* (Fig S1C). Production of ectopic cell divisions in GCs, therefore, depends on the RBR1 binding residues in *CYCD7;1*.

### **CYCD7;1 needs CDKB1 activity to drive ectopic divisions**

Cyclins bind to CDKs to ensure kinase activity and completion of cell division. It was previously shown that *CDKB1;1* is enriched in late stomatal lineage cells (Boudolf et al., 2004) and *CDKA;1* is expressed in all dividing cells (Adachi et al., 2009), making these potential *CYCD7;1* partners. In addition, reduction or loss of CDK activity (e.g., dominant-negative *CDKB1;1-N161* (Boudolf et al., 2004), *cdk1;1 cdk1;2* double mutants (Xie et al., 2010) or hypomorphic *cdka;1* mutants (Weimer et al., 2012)) results in undivided guard cells, though these cells may still express GC fate markers. To test whether *CYCD7;1* required CDK activity to drive divisions, we expressed *CYCD7;1-YFP* and *CYCD7;1<sup>LGK</sup>-YFP* under the *CYCD7;1* promoter in plants bearing a dominant negative version of *CDKB1;1* (*CDKB1;1-N161*, Fig. 3H-J). Although we could see expression of both *CYCD7;1* markers in arrested GMCs, they could neither rescue the phenotype nor trigger ectopic cell divisions (Fig. 3I-K). Thus *CYCD7;1* requires *CDKB1* activity either as a partner, or downstream at the G2/M transition for completion of the division.

### **CYCD7;1 expression domain is constrained by stomatal lineage transcription factors**

Our evidence points to *CYCD7;1* acting like a canonical *CYCD*, therefore we turned our attention to regulation of its highly restricted expression pattern. Transcription factors MUTE and FAMA partially overlap *CYCD7;1* expression (Fig 1I-N) – but MUTE precedes *CYCD7;1* while FAMA persists longer. In addition, the R2R3 MYB transcription factor, FOUR LIPS (FLP), is expressed in GMCs and young GCs (Lai et al., 2005; Lee et al., 2014; Xie et al., 2010) and has been associated with cell cycle control in guard cells through its repression of *CDKB1;1* (Lee et al., 2013; Vanneste et al., 2011; Xie et al., 2010). Given these patterns, we tested whether MUTE was necessary to induce *CYCD7;1* expression and whether FLP and FAMA repressed it. When *pCYCD7;1:CYCD7;1-YFP* was crossed into the *mute* mutant, we could observe the typical *mute* phenotype of many small meristemoid-like cells that fail to differentiate into GMCs (Pillitteri et al., 2007). In a few of these meristemoid-like cells, we detected weak *CYCD7;1-YFP* signal (Fig. 4A,B). Fluorescence intensity measurements showed that *CYCD7;1-YFP* signals in *mute* are ~50% reduced (Fig. 4C-E) indicating that MUTE promotes *CYCD7;1* expression, though it is not absolutely essential for it. In none of these images did we observe any ectopic divisions of the meristemoid-like cells. Mutations in *FLP* and its redundantly acting homologue *MYB88* result in GMCs dividing multiple times before transitioning into GCs (Fig. 4F,I). *CYCD7;1-YFP* (and *CYCD7;1<sup>LGK</sup>-YFP*) translational reporters are highly expressed in *flp/myb88*, a result consistent with *FLP/MYB88* repressing *CYCD7;1* (Fig. 4F-L). Interestingly *CYCD7;1-YFP*, but not *CYCD7;1<sup>LGK</sup>-YFP*, induces ectopic divisions in the *flp/myb88* GMCs and GCs (Fig. 4F-L).

The elevation of *CYCD7;1* levels in *flp/myb88* suggests that *CYCD7;1* is repressed to limit its expression domain. We next tested whether this was true for FAMA. Additionally, because FAMA is a master transcriptional regulator of stomatal division and differentiation, we tested whether its regulation of *CYCD7;1* was direct. In *fama* mutants GMCs divide repeatedly without attaining GC fate (Fig. 5A-E). We found that these “tumors” express *CYCD7;1-YFP* (Fig. 5B,C) as would be expected if FAMA acted to repress *CYCD7;1*. It is important to note, however, that after its initial upregulation, *CYCD7;1-YFP* expression fades in the *fama* “tumors” in older leaves, suggesting that *CYCD7;1* is also subject to

posttranslational regulation (Fig. 5D,E). In the *fama* tumors, *pCYCD7;1:CYCD7;1-YFP* also drives ectopic divisions (Fig. 5B,D,F, white arrowheads), but the *CYCD7;1<sup>LGK</sup>* version that cannot bind RBR1, does not (Fig. 5C,E,F). To test whether FAMA might directly regulate *CYCD7;1*, we extracted reads from a FAMA ChIP-seq experiment, performed under similar conditions as in (Lau and Bergmann, 2015; Lau et al., 2014) and found FAMA associated with the promoter region and gene body of *CYCD7;1* (Fig. 5G, Fig. S3).

Because *CYCD7;1-YFP* expression is extinguished before FAMA-YFP (Fig 1L-N) and prolonged in *fama*, FAMA is expected to repress *CYCD7;1* expression in GMCs. To test this, we transformed a estradiol-inducible version of FAMA (Hachez et al., 2011; Ohashi-Ito and Bergmann, 2006) into plants harboring the *pCYCD7;1:YFP* reporter line. This enabled us to provide a pulse of FAMA overexpression and follow *CYCD7;1* response in the appropriate cells over time in intact leaves. We observed a significant reduction of YFP fluorescence in GMCs during an 8 hour time course following estradiol (but not mock) induction of FAMA (Fig. S4).

The phenotypes of loss and gain of *CYCD7;1* activity suggest that its narrow window of expression is essential to guarantee a 2-celled stomatal complex. Using the *FAMA* promoter in wild type, thus driving *CYCD7;1* slightly later than under its endogenous cis-regulatory control, we find a dramatic enhancement of ectopic divisions (Fig. 5H-L). Compared to *pCYCD7;1:CYCD7;1-YFP* in which ~18% of stomata were 4-celled at 5 dag (Fig. 3G), in *pFAMA:CYCD7;1-YFP*, that number was ~70%, with 2% of stomata being 8-celled (N=237). The amount of 4-celled stomata increases to 87% at 12 dag, with another 2% being 8-celled (N=153) (Fig. 5L). Quantification of fluorescence intensity indicates that expression with *FAMA* and *CYCD7* promoters yields equivalent levels of *CYCD7;1-YFP* in GMCs (Fig. S1C), however, this fusion protein persists in ectopically divided GCs when expressed under the *FAMA* promoter (Fig. 5H). This directly links the activity of FAMA as a lineage specific transcription factor with the cell cycle regulator *CYCD7;1* to ensure “one and only one division” to create a pair of guard cells.

## Discussion

We have shown that *CYCD7;1* is specifically expressed in GMCs prior to the last symmetric cell division that forms the 2-celled stomatal complex. Depletion of *CYCD7;1* slows down this cell division whereas ectopic expression of *CYCD7;1* can trigger cell divisions in GCs. Mutation of the RBR1 binding motif in *CYCD7;1* disrupts its interaction with RBR1 and renders *CYCD7;1<sup>LGK</sup>* incapable of driving ectopic division. The connection to RBR1 fits with previous work showing that *CYCD7;1* interacts with *CDKA;1* (Van Leene et al., 2010), together supporting a role for *CYCD7;1* in the canonical regulatory complex for G1/S transitions and the commitment to divide. *CYCD7;1* activity in cell cycles, however, is directly repressed by the lineage specific transcription factor FAMA to ensure a coupling between the cell division which terminates the stomatal lineage, and the formation of terminally fated GCs. This interconnection represents a direct link between cell cycle regulators and developmental decisions (Fig. 6).

CYCDs are critical for the G1/S transition and commitment to divide, and are therefore interesting candidate hubs for the integration of developmental control with the cell cycle machinery. In *Arabidopsis*, there are 10 D-type cyclins, some active in multiple tissues (*CYCD3s*, *CYCD4s*, *CYCD2;1*) but others whose activity is linked to specific cell types (*CYCD6;1* and *CYCD7;1*) or cell cycle behaviors (*CYCD5;1* in endoreplication) (Dewitte et al., 2007; Kono et al., 2007; Sanz et al.,

2011; Sterken et al., 2012) (Adrian et al., 2015; Sozzani et al., 2010), this study). Phylogenetic analyses showed that CYCD6;1 and CYCD7;1 proteins diverge from other D-type cyclins in *Arabidopsis* (Wang et al., 2004), but also that CYCD7;1 most closely resembles the single D-type cyclin in *Physcomitrella* (Menges et al., 2007), consistent with our observation that it could promote G1/S transitions (a core D-type activity) in multiple cell types.

Interestingly, both CYCD6;1 and CYCD7;1 are limiting for essential formative divisions during development. In the root, CYCD6;1 is important for the cortex endodermis initial daughter (CEID) cell divisions (Sozzani et al., 2010; Weimer et al., 2012). Here, SHORTROOT (SHR) directly activates expression of CYCD6;1 which works in concert with CDKA;1 to trigger the formative division of the CEID (Cruz-Ramírez et al., 2012; Sozzani et al., 2010; Weimer et al., 2012). This interaction promotes the initiation of an asymmetric stem-cell division program. In contrast, CYCD7;1 expression marks the boundary between two types of divisions: the continual asymmetric divisions of meristemoids vs. the single symmetric division of a GMC. Here we find a quantitative requirement for *MUTE* to promote full CYCD7;1 expression, but a clear requirement for FAMA and FLP/MYB88 to repress CYCD7;1 after GMC division. The low expression level of CYCD7;1 in the absence of *MUTE* may point to a direct role for *MUTE* in activating CYCD7;1 expression. *MUTE* is structurally similar to FAMA, and therefore might be able to interact with *CYCD7;1* regulatory sequences. Alternatively, as meristemoid cells in *mute* never transition into GMCs, low *CYCD7;1* levels may be an indirect consequence of altered cell fate. In either case, it is notable that the introduction of CYCD7;1-YFP in *mute* did not drive additional meristemoid cell divisions, suggesting that CYCD7;1's division-promoting behavior requires a threshold level not reached in this genetic background.

It is tempting to speculate that spatiotemporal restriction of CYCDs could be a mechanism to control the cell cycle machinery more efficiently and to cope with different developmental programs. For example, leaves lose overall division competency and general cell cycle gene expression as they mature, leading to a situation where GMCs are caught in a largely post-mitotic zone. Formation of functional stomata, however, requires that the GMC divides again--though only once, as there have yet to be found plants whose stomatal pores are flanked by more than two guard cells (McElwain et al., 2016). The importance of specialized CYCDs, however, must be squared with the relatively minor phenotypes associated with their loss – neither *CYCD7;1* nor *CYCD6;1* mutants abolish the production of specialized cells or tissue layers (e.g. Fig. 2 and (Sozzani et al., 2010)). Most likely, CYCD6;1 and CYCD7;1 assist other, more general, cyclins in executing cell division programs or they may ensure particularly high cell cycle kinase activity. For example, in leaves, CYCD3;1 and CYCD3;2, despite being considered general G1/S cyclins (Dewitte et al., 2007; Dewitte et al., 2003; Menges et al., 2006), show high expression in the stomatal lineage (Adrian et al., 2015) and could be partially redundant with CYCD7;1. It is also important to recognize that CYCD/CDKA complexes likely have various downstream targets and that increased kinase activity could induce different downstream processes, either in a feedback loop or for differentiation processes. In plants, specific CDK/cyclin complexes can have differential activity towards individual substrates. Both CDK and cyclin proteins contribute to substrate recognition (Harashima and Schnittger, 2012), but there is evidence that the cyclin plays the more prominent role (Weimer et al., 2016). Specific expression of individual cyclins, such as CYCD7;1 in the stomatal lineage, therefore, could contribute to fine-tuning of cell division control and downstream substrate recognition.

## Material and Methods

### Plant material and growth conditions

*Arabidopsis thaliana* Columbia (Col-0) was used as wild type in all experiments except as noted in Fig. S2. Seedlings were grown on half-strength Murashige and Skoog (MS) medium (Caisson labs, USA) medium at 22°C under 16 hour-light/8 hour-dark cycles and were examined at the indicated time. The following previously described mutants and reporter lines were used in this study: *mute* (Pillitteri et al., 2007); *fama-1* (Ohashi-Ito and Bergmann, 2006); *flp;myb88* (Lai et al., 2005); *proSPCH:SPCH:CFP* and *proMUTE:MUTE-YFP* (Davies and Bergmann, 2014); *proRBR1:RBR1-CFP* (Cruz-Ramírez et al., 2012), *pro35S:CDKB1;1-N161* (Boudolf et al., 2004); *proCDKB1;1:GUS* (Boudolf et al., 2004).

### CYCD7;1 mutants

CYCD7;1 mutants FLAG\_369E02 (*cycd7;1-1*) and FLAG\_498H08 (*cycd7;1-2*) were derived from the INRA/Versaille collection (Versaille, France) and both lines were outcrossed to Col-0 twice. GK\_496G06-019628 was derived from the GABI-Kat collection (Cologne, Germany). SALK\_068423 and SALK\_068526 were obtained from ABRC (Columbus, USA).

### Vector construction and plant transformation

Constructs were generated using the Gateway® system (Invitrogen, CA, USA). Appropriate genome sequences (PCR amplified from Col-0 or from entry clones) were cloned into Gateway compatible entry vectors, typically pENTR/D-TOPO (Life Technologies, CA, USA), to facilitate subsequent cloning into plant binary vectors pHGY (Kubo et al., 2005) or R4pGWB destination vector system (Nakagawa et al., 2008; Tanaka et al., 2011). The translational reporter for CYCD7;1 was generated by cloning the genomic fragment (promoter+CDS) into the entry vector pENTR to generate the entry vector CYCD7;1-genomic-pENTR, followed by LR recombination into the destination vector pHGY to generate the final construct. For the translational reporter for CYCD7;1<sup>LGK</sup>, the LxCxE motif of CYCD7;1-genomic-pENTR was mutated to LxGxK by site directed mutagenesis using the QuikChange II Kit (Agilent, CA, USA) to generate the entry clone CYCD7;1-genomic-pENTR and then recombined into pHGY. The transcriptional reporters for CYCD7;1 were generated by cloning the CYCD7;1 promoter region into pENTR, then recombined into the destination vectors pHGY (cytosolic YFP). The other constructs generated in this study *proCYCD7;1:YFP-YFPnls* (a transcriptional reporter fused to YFP and a second nlsYFP), *proFAMA:FAMA-CFP*, *proML1:CYCD7;1-YFP*, *proML1:CYCD7;1*, *proCYCD7;1:CYCD7;1*, and *proFAMA:CYCD7;1-YFP* were generated with the tripartite recombination of the plant binary vector series R4pGWB (Nakagawa et al., 2008; Tanaka et al., 2011), with the Gateway entry clones of the promoters and coding sequences compatible with the binary R4pGWB destination vector system. Primer sequences used for entry clones are provided in Table S1. Transgenic plants were generated by *Agrobacterium*-mediated transformation (Clough, 2005) and transgenic seedlings were selected by growth on half-strength MS plates supplemented with 50 mg/L Hygromycin (pHGY, p35HGY, pGWB1, pGWB540 based constructs) or Kanamycin 100 mg/L (pGWB440 and pGWV401 based constructs) or 12 mg/L of Basta (pGWB640 based constructs).



### Confocal and DIC microscopy

For confocal microscopy, images were taken with a Leica SP5 microscope and processed in ImageJ. Cell outlines were visualized by either 0.1 mg/ml propidium iodide in water (Molecular Probes, OR, USA) incubation for 10 min, rinsed in H<sub>2</sub>O once). For DIC microscopy, samples were cleared in 7:1 ethanol:acetic acid, treated 30 min with 1N potassium hydroxide, rinsed in water, and mounted in Hoyer's medium. Differential contrast interference (DIC) images were obtained from the middle region of adaxial epidermis of cotyledons on a Leica DM2500 microscope or Leica DM6 B microscope.

### Quantification of fluorescent intensity

Images of GMCs in cotyledons were taken at 4 dag with identical settings between *mute* mutants and their sister plants from a segregating population and processed in ImageJ. Fluorescent intensity was measured as mean gray value in the nucleus, subtracted by the background. Measurements were averaged for mutant and control experiments with Student's-t-test used to determine the statistical significance.

### GUS staining

The two-times to Col-0 outcrossed *cyd7;1-1* mutant was introgressed into CDKB1;1-GUS marker lines. 5-day old seedlings were incubated in staining solution for 12 hours and destained in 70% ethanol at 60–70°C for four hours. Staining solution for 5ml: 100µl of 10% Triton X-100, 250µl 1M NaPO<sub>4</sub> (pH 7.2), 100µl 100mM potassium ferrocyanide, 100µl potassium ferricyanide, 400µl 25 mM X-Gluc, 4050µl dH<sub>2</sub>O. Images were taken with a Leica DM6 B microscope.

### EdU labeling

EdU labeling was performed using the Click-iT® EdU Alexa Fluor® 488 Imaging Kit (ThermoFisher Scientific, MA, USA). 4-day old seedlings were incubated in 20µM EdU solution in half-strength MS for 90 minutes at room temperature. Seedlings were transferred to new tubes and washed three times with wash buffer (1% BSA in PBS). Wash buffer was removed and fixation buffer was added (3.7% formaldehyde in PBS) for 30 min at room temperature. Seedlings were transferred to new tubes and washed two times with permeabilization buffer (0.5% Triton x-100 in PBS) for 10 minutes each, protected from light on a slow rocking platform. Plants were transferred to new tubes and incubated in reaction cocktail (455µL Click-IT reaction buffer, 20µL CuSO<sub>4</sub>, 2µL Alexa Fluor Azide 488, 25 µL 1x Click-IT EdU additive) for 1 hour at room temperature, protected from light, without agitation. Seedlings were transferred to new tubes and washed twice for 10 minutes at room temperature with wash buffer on a slow rocking platforms, protected from light. Cotyledons were imaged using a Leica SP5 microscope not more than two hours after the completion of washes and processed in ImageJ.

### qPCR

100 mg ground frozen material from 6-day old plants was used for RNA extraction according to the manufacture's manual (RNeasy Mini Kit, Qiagen, Germany). 1µg total RNA was used as a template for cDNA synthesis (iScript cDNA synthesis kit, BioRad, CA, USA). qPCR setup was according to the manual of the SsoAdvanced Universal SYBR Green Supermix (BioRad, CA, USA). qPCR was performed by CFX96 Real Time C1000 Thermal Cycler (BioRad, CA, USA) according to the following reaction conditions: 95°C for 30 s, followed by 39 cycles at 95°C for 10 s and at 60°C for 30 s. ACTIN was used as a reference gene for all qPCRs performed. Primers can be found in Table 1.

## **Acknowledgments**

We thank members of the Bergmann lab for helpful comments on the manuscript and Charles Hachez (UCLouvain) for his contributions to the initiation of the *CYCD7;1* project.

## **Contributions**

A.K.W. and J.M. performed all experiments, except *CYCD7;1* response to FAMA induction (N.S.) and the creation of outcrossed *cycd7;1-1 pCDKB1;1:GUS* and *cycd7;1-2* (F.P., J.M. and W.D.).

A.K.W. did quantifications, statistical analysis and created figures (except Figure 1 (J.M.)).

A.K.W., J.M. and D.C.B. designed experiments and wrote the manuscript.

## **Competing Interests**

The authors declare no competing or financial interest.

## **Funding**

A.K.W is supported by a postdoctoral fellowship from the German Research Foundation (DFG). D.C.B. is an investigator of the Howard Hughes Medical Institute.

## References

- Adachi, S., Nobusawa, T. and Umeda, M.** (2009). Quantitative and cell type-specific transcriptional regulation of A-type cyclin-dependent kinase in *Arabidopsis thaliana*. *Dev. Biol.* **329**, 306–314.
- Adrian, J., Chang, J., Ballenger, C. E., Bargmann, B. O. R., Alassimone, J., Davies, K. A., Lau, O. S., Matos, J. L., Hachez, C., Lanctot, A., et al.** (2015). Transcriptome dynamics of the stomatal lineage: birth, amplification, and termination of a self-renewing population. *Dev. Cell* **33**, 107–118.
- Borghi, L., Gutzat, R., Fütterer, J., Laizet, Y., Hennig, L. and Gruijssem, W.** (2010). *Arabidopsis* RETINOBLASTOMA-RELATED is required for stem cell maintenance, cell differentiation, and lateral organ production. *Plant Cell* **22**, 1792–1811.
- Boudolf, V., Barrôco, R., Engler, J. de A., Verkest, A., Beeckman, T., Naudts, M., Inzé, D. and De Veylder, L.** (2004). B1-type cyclin-dependent kinases are essential for the formation of stomatal complexes in *Arabidopsis thaliana*. *Plant Cell* **16**, 945–955.
- Bramsiepe, J., Wester, K., Weigl, C., Roodbarkelari, F., Kasili, R., Larkin, J. C., Hülskamp, M. and Schnittger, A.** (2010). Endoreplication controls cell fate maintenance. *PLoS Genet.* **6**, e1000996.
- Clough, S. J.** (2005). Floral dip: agrobacterium-mediated germ line transformation. *Methods Mol. Biol.* **286**, 91–102.
- Collins, C., Dewitte, W. and Murray, J. A. H.** (2012). D-type cyclins control cell division and developmental rate during *Arabidopsis* seed development. *J. Exp. Bot.* **63**, 3571–3586.
- Cruz-Ramírez, A., Díaz-Triviño, S., Blilou, I., Grieneisen, V. A., Sozzani, R., Zamioudis, C., Miskolczi, P., Nieuwland, J., Benjamins, R., Dhonukshe, P., et al.** (2012). A bistable circuit involving SCARECROW-RETINOBLASTOMA integrates cues to inform asymmetric stem cell division. *Cell* **150**, 1002–1015.
- Davies, K. A. and Bergmann, D. C.** (2014). Functional specialization of stomatal bHLHs through modification of DNA-binding and phosphoregulation potential. *PNAS* **111**, 15585–15590.
- De Veylder, L., Beeckman, T. and Inzé, D.** (2007). The ins and outs of the plant cell cycle. *Nat. Rev. Mol. Cell Biol.* **8**, 655–665.
- Desvoyes, B., Ramirez-Parra, E., Xie, Q., Chua, N.-H. and Gutierrez, C.** (2006). Cell Type-Specific Role of the Retinoblastoma/E2F Pathway during *Arabidopsis* Leaf Development. *Plant Physiol.* **140**, 67–80.
- Dewitte, W., Riou-Khamlichi, C., Scofield, S., Healy, J. M. S., Jacquard, A., Kilby, N. J. and Murray, J. A. H.** (2003). Altered cell cycle distribution, hyperplasia, and inhibited differentiation in *Arabidopsis* caused by the D-type cyclin CYCD3. *The Plant Cell* **15**, 79–92.

- Dewitte, W., Scofield, S., Alcasabas, A. A., Maughan, S. C., Menges, M., Braun, N., Collins, C., Nieuwland, J., Prinsen, E., Sundaresan, V., et al.** (2007). Arabidopsis CYCD3 D-type cyclins link cell proliferation and endocycles and are rate-limiting for cytokinin responses. *PNAS* **104**, 14537–14542.
- Friedman, W. E.** (1999). Expression of the cell cycle in sperm of Arabidopsis: implications for understanding patterns of gametogenesis and fertilization in plants and other eukaryotes. *Development* **126**, 1065–1075.
- Gutzat, R., Borghi, L. and Gruijssem, W.** (2012). Emerging roles of RETINOBLASTOMA-RELATED proteins in evolution and plant development. *Trends Plant Sci.* **17**, 139–148.
- Hachez, C., Ohashi-Ito, K., Dong, J. and Bergmann, D. C.** (2011). Differentiation of Arabidopsis guard cells: analysis of the networks incorporating the basic helix-loop-helix transcription factor, FAMA. *Plant Physiol.* **155**, 1458–1472.
- Harashima, H. and Schnittger, A.** (2012). Robust reconstitution of active cell-cycle control complexes from co-expressed proteins in bacteria. *Plant Methods* **8**, 23.
- Harashima, H., Dissmeyer, N. and Schnittger, A.** (2013). Cell cycle control across the eukaryotic kingdom. *Trends in Cell Biology* **23**, 345–356.
- Harbour, J. W. and Dean, D. C.** (2000). The Rb/E2F pathway: expanding roles and emerging paradigms. *Genes Dev.* **14**, 2393–2409.
- Inzé, D. and De Veylder, L.** (2006). Cell cycle regulation in plant development. *Annu. Rev. Genet.* **40**, 77–105.
- Kanaoka, M. M., Pillitteri, L. J., Fujii, H., Yoshida, Y., Bogenschutz, N. L., Takabayashi, J., Zhu, J.-K. and Torii, K. U.** (2008). SCREAM/ICE1 and SCREAM2 specify three cell-state transitional steps leading to arabidopsis stomatal differentiation. *Plant Cell* **20**, 1775–1785.
- Katagiri, Y., Hasegawa, J., Fujikura, U., Hoshino, R., Matsunaga, S. and Tsukaya, H.** (2016). The coordination of ploidy and cell size differs between cell layers in leaves. *Development* **143**, 1120–1125.
- Kono, A., Umeda-Hara, C., Adachi, S., Nagata, N., Konomi, M., Nakagawa, T., Uchimiya, H. and Umeda, M.** (2007). The Arabidopsis D-type cyclin CYCD4 controls cell division in the stomatal lineage of the hypocotyl epidermis. *Plant Cell* **19**, 1265–1277.
- Kubo, M., Udagawa, M., Nishikubo, N., Horiguchi, G., Yamaguchi, M., Ito, J., Mimura, T., Fukuda, H. and Demura, T.** (2005). Transcription switches for protoxylem and metaxylem vessel formation. *Genes Dev.* **19**, 1855–1860.
- Lai, L. B., Nadeau, J. A., Lucas, J., Lee, E.-K., Nakagawa, T., Zhao, L., Geisler, M. and Sack, F. D.** (2005). The Arabidopsis R2R3 MYB proteins FOUR LIPS and MYB88 restrict divisions late in the stomatal cell lineage. *Plant Cell* **17**, 2754–2767.



- Lau, O. S. and Bergmann, D. C.** (2015). MOBE-ChIP: a large-scale chromatin immunoprecipitation assay for cell type-specific studies. *Plant J.* **84**, 443–450.
- Lau, O. S., Davies, K. A., Chang, J., Adrian, J., Rowe, M. H., Ballenger, C. E. and Bergmann, D. C.** (2014). Direct roles of SPEECHLESS in the specification of stomatal self-renewing cells. *Science* **345**, 1605–1609.
- Lee, E., Liu, X., Eglit, Y. and Sack, F.** (2013). FOUR LIPS and MYB88 conditionally restrict the G1/S transition during stomatal formation. *J. Exp. Bot.* **64**, 5207–5219.
- Lee, E., Lucas, J. R. and Sack, F. D.** (2014). Deep functional redundancy between FAMA and FOUR LIPS in stomatal development. *Plant J.* **78**, 555–565.
- MacAlister, C. A., Ohashi-Ito, K. and Bergmann, D. C.** (2007). Transcription factor control of asymmetric cell divisions that establish the stomatal lineage. *Nature* **445**, 537–540.
- Matos, J. L. and Bergmann, D. C.** (2014). Convergence of stem cell behaviors and genetic regulation between animals and plants: insights from the Arabidopsis thaliana stomatal lineage. *F1000Prime Rep* **6**, 53.
- Matos, J. L., Lau, O. S., Hachez, C., Cruz-Ramírez, A., Scheres, B. and Bergmann, D. C.** (2014). Irreversible fate commitment in the Arabidopsis stomatal lineage requires a FAMA and RETINOBLASTOMA-RELATED module. *Elife* **3**, 1792.
- McElwain, J. C., Yiotis, C. and Lawson, T.** (2016). Using modern plant trait relationships between observed and theoretical maximum stomatal conductance and vein density to examine patterns of plant macroevolution. *New Phytologist* **209**, 94–103.
- Menges, M., Hennig, L., Gruissem, W. and Murray, J. A. H.** (2003). Genome-wide gene expression in an Arabidopsis cell suspension. *Plant Mol. Biol.* **53**, 423–442.
- Menges, M., Pavesi, G., Morandini, P., Bögre, L. and Murray, J. A. H.** (2007). Genomic organization and evolutionary conservation of plant D-type cyclins. *Plant Physiol.* **145**, 1558–1576.
- Menges, M., Samland, A. K., Planchais, S. and Murray, J. A. H.** (2006). The D-type cyclin CYCD3;1 is limiting for the G1-to-S-phase transition in Arabidopsis. *The Plant Cell* **18**, 893–906.
- Nakagami, H., Kawamura, K., Sugisaka, K., Sekine, M. and Shinmyo, A.** (2002). Phosphorylation of retinoblastoma-related protein by the cyclin D/cyclin-dependent kinase complex is activated at the G1/S-phase transition in tobacco. *The Plant Cell* **14**, 1847–1857.
- Nakagawa, T., Nakamura, S., Tanaka, K., Kawamukai, M., Suzuki, T., Nakamura, K., Kimura, T. and Ishiguro, S.** (2008). Development of R4 Gateway Binary Vectors (R4pGWB) Enabling High-Throughput Promoter Swapping for Plant Research. *Bioscience, Biotechnology, and Biochemistry* **72**, 624–629.

- Nowack, M. K., Harashima, H., Dissmeyer, N., Zhao, X., Bouyer, D., Weimer, A. K., De Winter, F., Yang, F. and Schnittger, A.** (2012). Genetic framework of cyclin-dependent kinase function in Arabidopsis. *Dev. Cell* **22**, 1030–1040.
- Ohashi-Ito, K. and Bergmann, D. C.** (2006). Arabidopsis FAMA controls the final proliferation/differentiation switch during stomatal development. *Plant Cell* **18**, 2493–2505.
- Pillitteri, L. J. and Torii, K. U.** (2007). Breaking the silence: three bHLH proteins direct cell-fate decisions during stomatal development. *BioEssays* **29**, 861–870.
- Pillitteri, L. J., Sloan, D. B., Bogenschutz, N. L. and Torii, K. U.** (2007). Termination of asymmetric cell division and differentiation of stomata. *Nature* **445**, 501–505.
- Riou-Khamlichi, C., Menges, M., Healy, J. M. S. and Murray, J. A. H.** (2000). Sugar Control of the Plant Cell Cycle: Differential Regulation of Arabidopsis D-Type Cyclin Gene Expression. *Mol. Cell. Biol.* **20**, 4513–4521.
- Roeder, A. H. K., Chickarmane, V., Cunha, A., Obara, B., Manjunath, B. S. and Meyerowitz, E. M.** (2010). Variability in the control of cell division underlies sepal epidermal patterning in Arabidopsis thaliana. *PLoS Biol.* **8**, e1000367.
- Sanz, L., Dewitte, W., Forzani, C., Patell, F., Nieuwland, J., Wen, B., Quelhas, P., De Jager, S., Titmus, C., Campilho, A., et al.** (2011). The Arabidopsis D-Type Cyclin CYCD2;1 and the Inhibitor ICK2/KRP2 Modulate Auxin-Induced Lateral Root Formation. *The Plant Cell* **23**, 641–660.
- Schellmann, S., Schnittger, A., Kirik, V., Wada, T., Okada, K., Beermann, A., Thumfahrt, J., Jürgens, G. and Hülskamp, M.** (2002). TRIPTYCHON and CAPRICE mediate lateral inhibition during trichome and root hair patterning in Arabidopsis. *The EMBO Journal* **21**, 5036–5046.
- Sozzani, R., Cui, H., Moreno-Risueno, M. A., Busch, W., Van Norman, J. M., Vernoux, T., Brady, S. M., Dewitte, W., Murray, J. A. H. and Benfey, P. N.** (2010). Spatiotemporal regulation of cell-cycle genes by SHORTROOT links patterning and growth. *Nature* **466**, 128–132.
- Sterken, R., Kiekens, R., Boruc, J., Zhang, F., Vercauteren, A., Vercauteren, I., De Smet, L., Dhondt, S., Inzé, D., De Veylder, L., et al.** (2012). Combined linkage and association mapping reveals CYCD5;1 as a quantitative trait gene for endoreduplication in Arabidopsis. *PNAS* **109**, 4678–4683.
- Tanaka, Y., Nakamura, S., Kawamukai, M., Koizumi, N. and Nakagawa, T.** (2011). Development of a series of gateway binary vectors possessing a tunicamycin resistance gene as a marker for the transformation of Arabidopsis thaliana. *Bioscience, Biotechnology, and Biochemistry* **75**, 804–807.
- Uemukai, K., Iwakawa, H., Kosugi, S., de Uemukai, S., Kato, K., Kondorosi, E., Murray, J. A., Ito, M., Shinmyo, A. and Sekine, M.** (2005). Transcriptional activation of tobacco E2F is repressed by co-transfection with the retinoblastoma-related protein: cyclin D expression overcomes this repressor activity. *Plant Mol. Biol.* **57**, 83–100.

- Umen, J. G. and Goodenough, U. W.** (2001). Control of cell division by a retinoblastoma protein homolog in *Chlamydomonas*. *Genes Dev.* **15**, 1652–1661.
- Van Leene, J., Hollunder, J., Eeckhout, D., Persiau, G., Van De Slijke, E., Stals, H., Van Isterdael, G., Verkest, A., Neiryneck, S., Buffel, Y., et al.** (2010). Targeted interactomics reveals a complex core cell cycle machinery in *Arabidopsis thaliana*. *Molecular Systems Biology* **6**, 397.
- Vandepoele, K., Raes, J., De Veylder, L., Rouzé, P., Rombauts, S. and Inzé, D.** (2002). Genome-Wide Analysis of Core Cell Cycle Genes in *Arabidopsis*. *The Plant Cell* **14**, 903–916.
- Vanneste, S., Coppens, F., Lee, E., Donner, T. J., Xie, Z., Van Isterdael, G., Dhondt, S., De Winter, F., De Rybel, B., Vuylsteke, M., et al.** (2011). Developmental regulation of CYCA2s contributes to tissue-specific proliferation in *Arabidopsis*. *The EMBO Journal* **30**, 3430–3441.
- Wang, G., Kong, H., Sun, Y., Zhang, X., Zhang, W., Altman, N., DePamphilis, C. W. and Ma, H.** (2004). Genome-wide analysis of the cyclin family in *Arabidopsis* and comparative phylogenetic analysis of plant cyclin-like proteins. *Plant Physiol.* **135**, 1084–1099.
- Weimer, A. K., Biedermann, S., Harashima, H., Roodbarkelari, F., Takahashi, N., Foreman, J., Guan, Y., Pochon, G., Heese, M., Van Damme, D., et al.** (2016). The plant-specific CDKB1-CYCB1 complex mediates homologous recombination repair in *Arabidopsis*. *The EMBO Journal* **35**, 2068–2086.
- Weimer, A. K., Nowack, M. K., Bouyer, D., Zhao, X., Harashima, H., Naseer, S., De Winter, F., Dissmeyer, N., Geldner, N. and Schnittger, A.** (2012). Retinoblastoma related1 regulates asymmetric cell divisions in *Arabidopsis*. *Plant Cell* **24**, 4083–4095.
- Xie, Z., Lee, E., Lucas, J. R., Morohashi, K., Li, D., Murray, J. A. H., Sack, F. D. and Grotewold, E.** (2010). Regulation of cell proliferation in the stomatal lineage by the *Arabidopsis* MYB FOUR LIPS via direct targeting of core cell cycle genes. *Plant Cell* **22**, 2306–2321.
- Zhao, X., Harashima, H., Dissmeyer, N., Pusch, S., Weimer, A. K., Bramsiepe, J., Bouyer, D., Rademacher, S., Nowack, M. K., Novak, B., et al.** (2012). A general G1/S-phase cell-cycle control module in the flowering plant *Arabidopsis thaliana*. *PLoS Genet.* **8**, e1002847.

## Figures

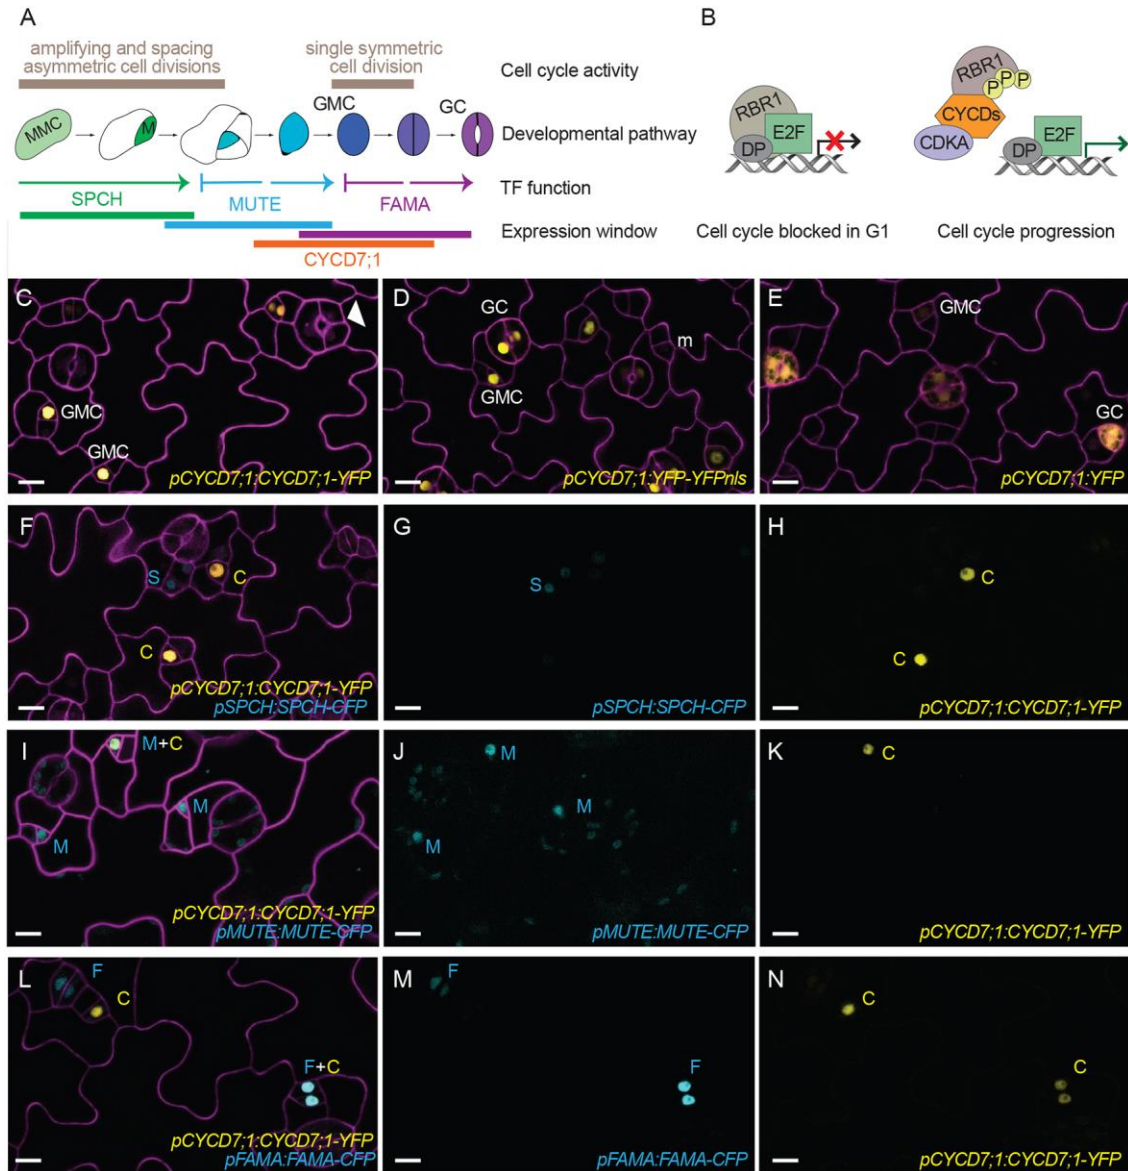

**Figure 1: CYCD7;1 is expressed in GMCs prior to the last symmetric division of the stomatal lineage**

(A) Scheme of stomatal development in *Arabidopsis thaliana*. Cell cycle activity depicted in beige, with cell fate transitions, function and expression window of master bHLH transcription factors SPCH (green), MUTE (blue), and FAMA (purple) and CYCD7;1 (orange). Meristemoid mother cells (light green, MMC) divide asymmetrically to enter the lineage. Meristemoids (green) can undergo amplifying and spacing asymmetric cell divisions until activity is terminated. Guard mother cells (GMC, blue) reenter the cell cycle only once to generate the pair of symmetric guard cells (GC, purple). (B) Cartoon of plant RBR1/CYCD complexes driving the G1 to S transition and commitment to divide. RBR1 binds to E2F-DP transcription factors and blocks their ability to induce transcription of S phase genes. CYCDs interact with RBR1 through their LxCxE motif and facilitate phosphorylation of RBR1 by the CDKA;1/CYCD complex. Upon phosphorylation RBR1 releases E2F transcription factors, which leads



to expression of S phase genes for DNA replication. **(C-E)** Expression of the translational reporter *pCYCD7;1:CYCD7;1-YFP*, the transcriptional reporters *pCYCD7;1:YFP-YFPnls* and *pCYCD7;1:YFP* (all yellow) in abaxial cotyledons. White arrowheads point at ectopic cell divisions. **(F-N)** Co-expression of *pCYCD7;1:CYCD7;1-YFP* (yellow, C) and *pSPCH:SPCH-CFP* (cyan, S), *pMUTE:MUTE-CFP* (cyan, M) and *pFAMA:FAMA-CFP* (cyan, F).

Confocal images were taken at 5 dag (days after germination). Cell outlines (magenta) are visualized with propidium iodide. All images are at the same magnification and scale bar is 10 $\mu$ M.

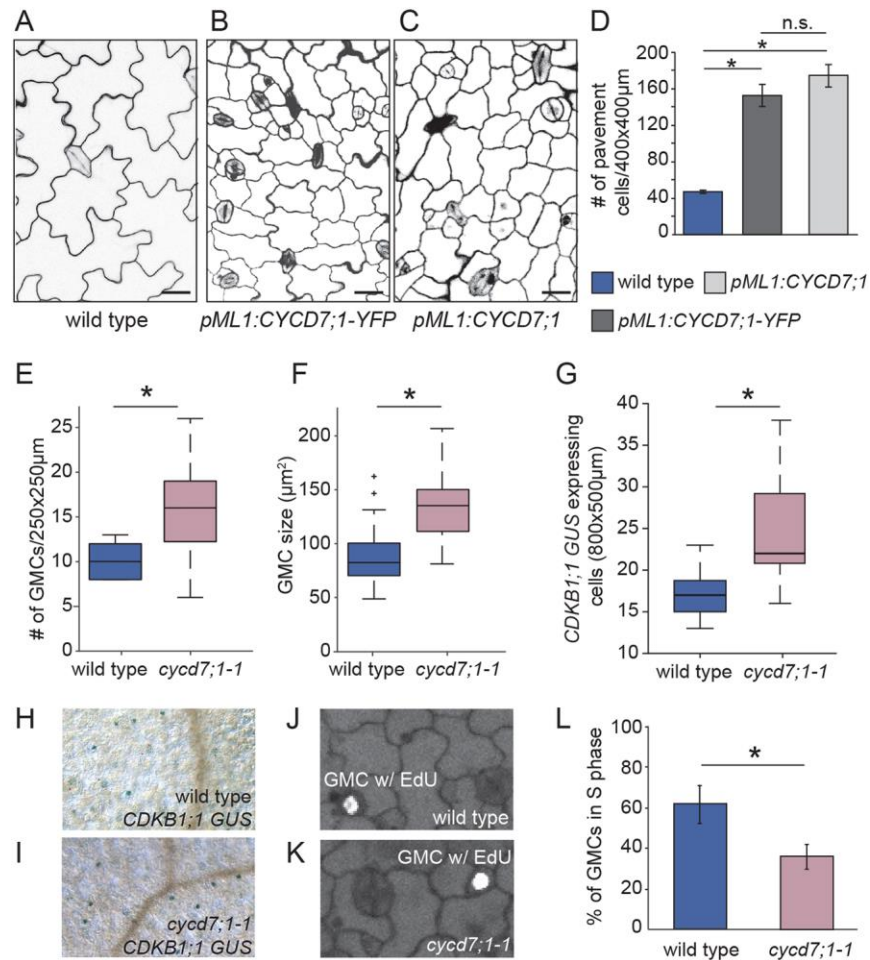

## Figure 2: CYCD7;1 promotes cell divisions

(A-C) Confocal images of adaxial cotyledon epidermes of wild type, and plant expressing *pML1:CYCD7;1-YFP* and *pML1:CYCD7;1* at 6 dag. Cell outlines were visualized with propidium iodide (magenta). Scale bar 20µM. (D) Quantification of extra divisions in *pML1:CYCD7;1* and *pML1:CYCD7;1-YFP* pavement cells compared to wild type in cotyledons at 5 dag. Error bars represent standard error; asterisks indicate significant difference (p-value <0.005; Student-t test); n.s. non-significant. (E) Quantification of the number of GMCs in wild type and *cycd7;1-1* cotyledons at 4 dag. Asterisk indicates significant difference (p-value = 0.0032; Mann-Whitney U test). (F) Quantification of GMC area in wild type (N=55) and *cycd7;1-1* (N=51) cotyledons at 4 dag. Asterisk indicates significant difference (p-value = 6.76E-13; Mann-Whitney U test). (G) Quantification of cells expressing the *CDKB1;1-GUS* marker in wild type and *cycd7;1-1* cotyledons at 5 dag. Asterisk indicates significant difference (p-value = 0.0023; Mann-Whitney U test). (H) Image of wild type cotyledon expressing *CDKB1;1-GUS* marker at 5 dag. (I) Image of *cycd7;1-1* cotyledon expressing *CDKB1;1-GUS* marker at 5 dag. (J) Image of wild type GMC with EdU (5-ethynyl-2'-deoxyuridine) labeling, 4-day old cotyledons. (K) Image of *cycd7;1-1* GMC with EdU labeling, 4-day old cotyledons. (L) Quantification of EdU labeling in wild type and *cycd7;1-1* mutants. Graph shows the % of GMCs in S phase during a 90-minute incubation with EdU. Error bars indicate the 95% confidence interval. Asterisk indicates significant difference (p-value = 7x10E-6; Fisher's Exact Test).

Center lines in box plots show the medians; box limits indicate the 25th and 75th percentiles; whiskers extend 1.5 times the interquartile range from the 25th and 75th percentiles.

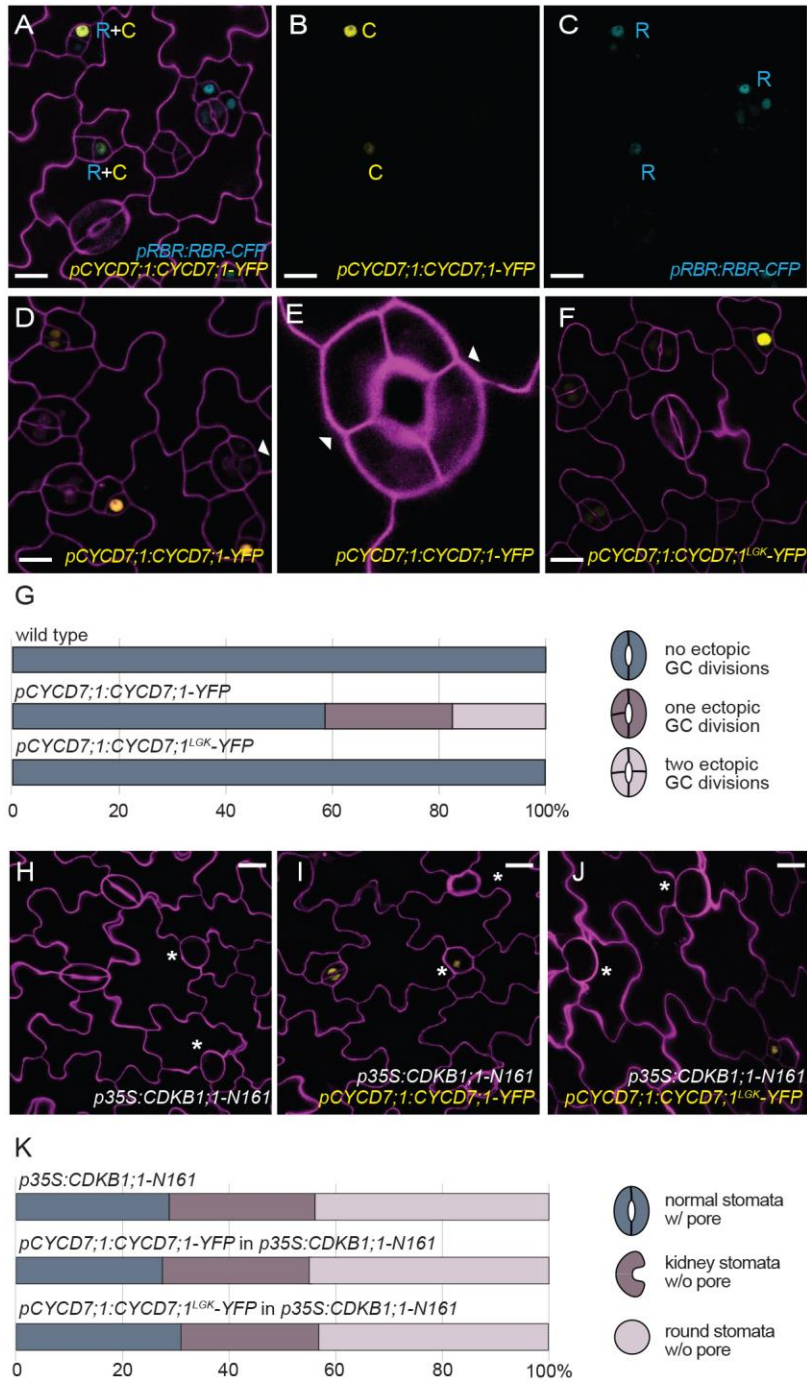

**Figure 3: CYCD7;1 requires RBR1 binding and CDKB1;1 activity for ectopic cell divisions**

(A-C) Co-expression of  $pCYCD7;1:CYCD7;1-YFP$  (yellow, C) and  $pRBR1:RBR1-CFP$  (cyan, R) in GMCs at 5 dag. (D-E) Expression of  $pCYCD7;1:CYCD7;1-YFP$  drives ectopic cell divisions (white arrowheads). (F) Expression of  $pCYCD7;1:CYCD7;1^{LGK}-YFP$  (yellow) does not drive ectopic cell divisions. (G) Quantification of ectopic cell divisions in GCs at 5 dag in cotyledons in wild type (N=173),  $pCYCD7;1:CYCD7;1-YFP$  (N=306) and  $pCYCD7;1:CYCD7;1^{LGK}-YFP$  (N=288); p-value 2.7343e-22, Mann-Whitney U test. (H) Phenotype of dominant negative  $p35S:CDKB1;1-N161$  at 6 dag.



White asterisks label arrested GMCs. **(I-J)** Failure of *pCYCD7;1:CYCD7;1-YFP* (I) and *pCYCD7;1:CYCD7;1<sup>LGK</sup>-YFP* (J) to suppress *CDKB1;1-N161* phenotype at 6 dag. White asterisks label arrested GMCs. **(K)** Quantification of stomata phenotypes in cotyledons in *p35S:CDKB1;1-N161* (N=238), *pCYCD7;1:CYCD7;1-YFP* in *p35S:CDKB1;1-N161* (N=296) and *pCYCD7;1:CYCD7;1<sup>LGK</sup>-YFP* in *p35S:CDKB1;1-N161* (N=217) at 6 dag.

Confocal images show cell outlines (magenta) stained with propidium iodide. Scale bar 10  $\mu\text{m}$  (A-D, F) and 20  $\mu\text{m}$  (H-J).

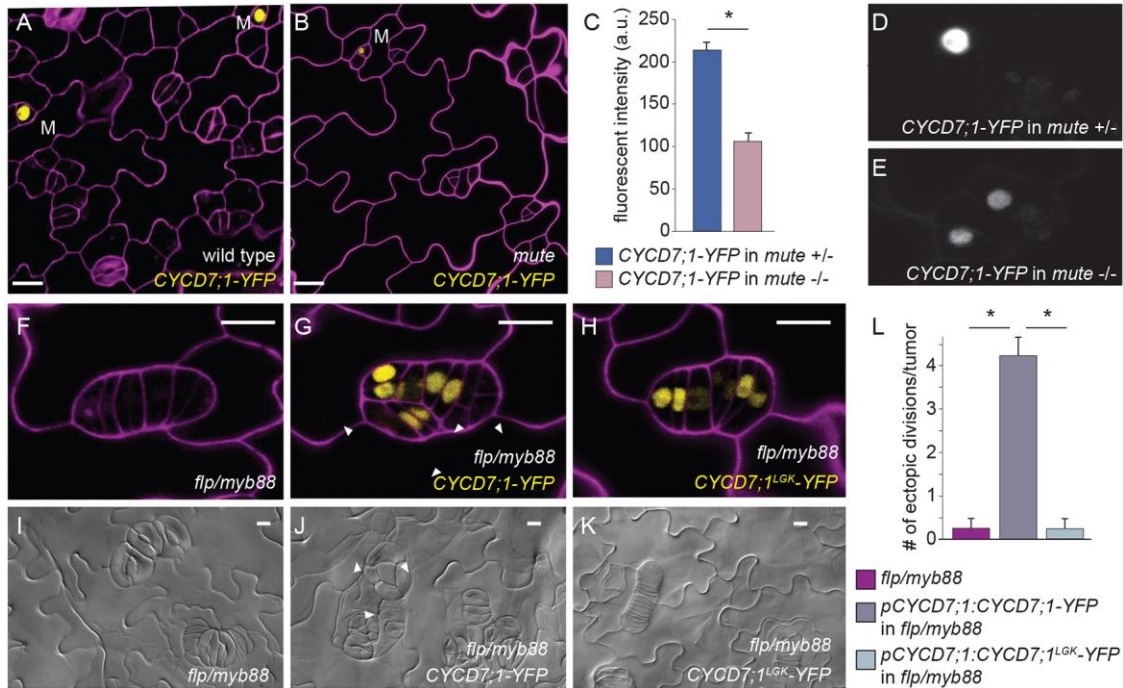

**Figure 4: CYCD7;1-YFP is expressed at low levels in *mute* mutants and persists and drives ectopic divisions in *flp/myb88* mutants**

(A, B) Wild type and *mute* mutants expressing *pCYCD7;1:CYCD7;1-YFP* in 6 day old cotyledons. M, meristemoid. (C-E) Quantification of fluorescence intensity of CYCD7;1-YFP in homozygous *mute* mutants (N=27) and their heterozygous or wild-type sister plants (N=21) (a.u., arbitrary units). Images of cotyledons were taken at 4 dag. Error bars show standard error. Asterisk shows statistical significance (p-value <0.0001; Student-t test). (F) Phenotype of the double mutant *flp/myb88* at 6 dag. (G) Expression of *pCYCD7;1:CYCD7;1-YFP* in *flp/myb88* drives ectopic divisions in tumors at 6 dag. (H) Expression of *pCYCD7;1:CYCD7;1<sup>LGK</sup>-YFP* in *flp/myb88* is less able to drive ectopic divisions at 6 dag. (I) DIC images of the phenotype of the double mutant *flp/myb88* at 12 dag. (J) Expression of *pCYCD7;1:CYCD7;1-YFP* in *flp/myb88* drives ectopic divisions in tumors at 12 dag. (K) Expression of *pCYCD7;1:CYCD7;1<sup>LGK</sup>-YFP* in *flp/myb88* is less able to drive ectopic divisions at 12 dag. (L) Quantifications of ectopic divisions in tumors of *flp/myb88* mutants and *pCYCD7;1:CYCD7;1-YFP* in *flp/myb88* mutant background and *pCYCD7;1:CYCD7;1<sup>LGK</sup>-YFP* in *flp/myb88* mutant background. Asterisks indicate significant difference (p-value <0.0001; Student-t test). White arrowheads label ectopic divisions. Confocal images show cell outlines (magenta) stained with propidium iodide. Scale bar 10μM.

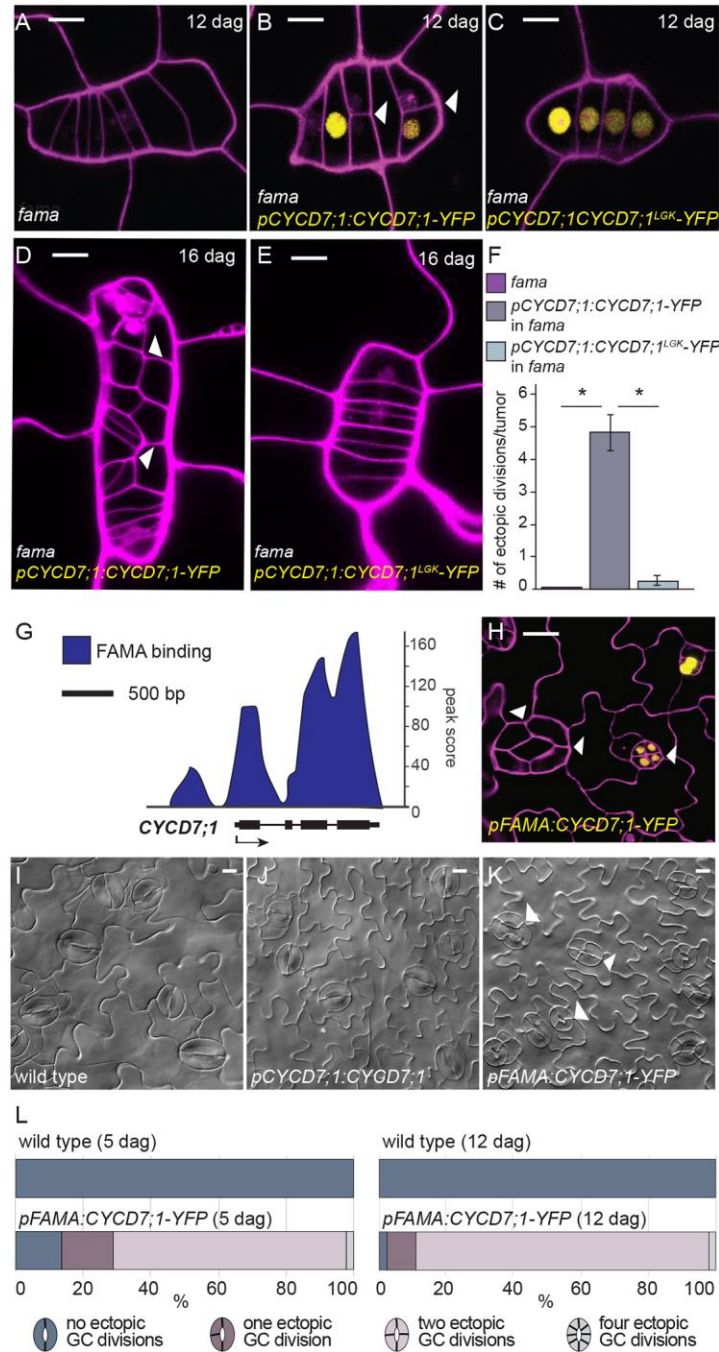

**Figure 5: CYCD7;1 expression is regulated by FAMA which serves to constrain CYCD7;1 activity** (A-E) Confocal images of *fama*, *pCYCD7;1:CYCD7;1-YFP* in *fama* mutant background and *pCYCD7;1:CYCD7;1<sup>LGK</sup>-YFP* in *fama* mutant background at 12 or 16 dag, respectively. (F) Quantifications of ectopic divisions in tumors of *fama* mutants and *pCYCD7;1:CYCD7;1-YFP* in *fama* mutant background and *pCYCD7;1:CYCD7;1<sup>LGK</sup>-YFP* in *fama* mutant background. Asterisks indicate significant difference (p-value <0.0001; Student-t test). (G) ChIP-Seq profile of FAMA binding to the promoter and gene body of *CYCD7;1*. Black arrow indicates gene orientation and transcriptional start sites. (H) Confocal image of *pFAMA:CYCD7;1-YFP* at 5 dag. White arrowheads show ectopic division

and prolonged CYCD7;1-YFP presence. **(I-K)** DIC images of abaxial cotyledon epidermis of wild type, *pCYCD7;1:CYCD7;1* and *pFAMA:CYCD7;1-YFP* at 12 dag. Arrowheads point at ectopic cell divisions. **(L)** Quantification of ectopic cell divisions in wild type (N=142) and *pFAMA:CYCD7;1-YFP* (N=237) at 5 dag (p-value 1.4371e-54, Mann-Whitney U test) and in wild type (N=125) and *pFAMA:CYCD7;1-YFP* (N=153) at 12 dag (p-value 1.3625e-55, Mann-Whitney U test). Differences between *pFAMA:CYCD7;1-YFP* at 5 dag and 12 dag are significant (p-value 6.4773e-05, Mann-Whitney U test). Differences are also significant between *pFAMA:CYCD7;1-YFP* at 5 dag and *pCYCD7;1:CYCD7;1-YFP* at 5 dag (Fig 3G; p-value 1.0473e-37, Mann-Whitney U test). Confocal images show cell outlines (magenta) stained with propidium iodide. Scale bar 10 $\mu$ m.

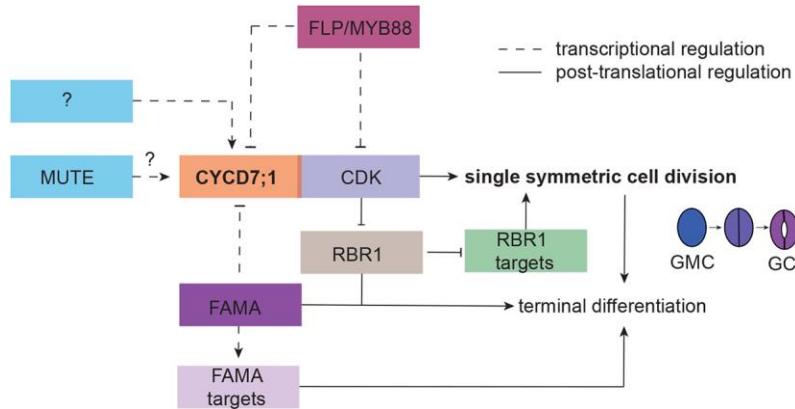

**Figure 6: Model of the developmental integration of CYCD7;1 to ensure lineage specific cell cycle regulation**

Cell cycle regulators are integrated with stomatal specific transcription factors to ensure the last formative division of the lineage creates a pair of symmetric guard cells. Initiation of CYCD7;1's expression in GMCs requires MUTE and additional unknown factors (question mark). CYCD7;1 together with its CDK partner executes the formative division of the GMC. Due to the observation that this last division is not completely abolished in *cycd7;1* mutants, other D-type cyclins likely promote the G1-S phase transition. CDK/CYCD complexes phosphorylate RBR1 in order to release its negative function on S phase promoting factors. To ensure termination of the lineage, the transcription factor FAMA, itself slightly later expressed than CYCD7;1, binds to the CYCD7;1 promoter to temporally restrict CYCD7;1 expression to GMCs and to restrict the cell cycle right after the last division. Transcriptional regulation is marked by dashed lines. This regulatory network ensures high cell cycle activity for the last formative division in the stomatal lineage and terminates cell division activity to "one and only one" division.



## Supplementary Data

Figure S1: Additional *CYCD7;1* expression patterns outside of the stomatal lineage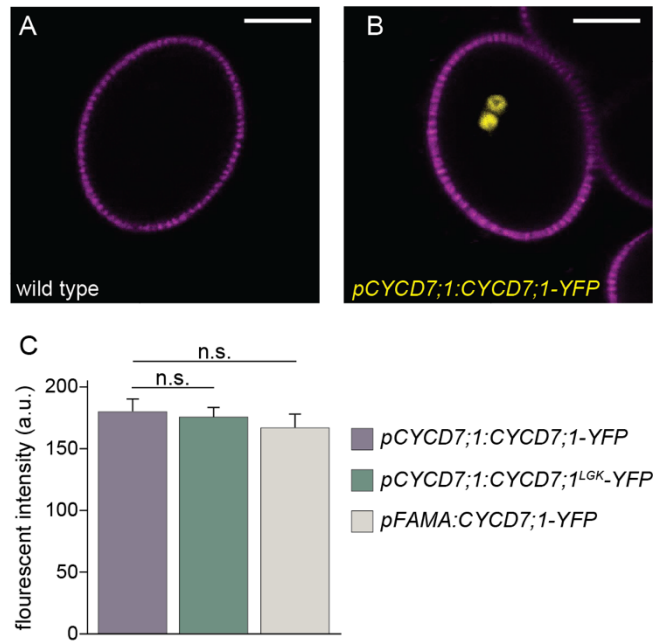

(A, B) *CYCD7;1* (yellow) is expressed in sperm cells during pollen anthesis. (C) Intensity measurements of fluorescent nuclei were 179 a.u.  $\pm$  10 S.E.M. for *proCYCD7;1:CYCD7;1-YFP* vs 176 a.u.  $\pm$  8 S.E.M. for *proCYCD7;1:CYCD7;1<sup>LGG</sup>-YFP* (N=15 nuclei/line;  $p > 0.05$ ; Student's t-test) and 166 a.u.  $\pm$  11 S.E.M. for *proFAMA:CYCD7;1-YFP* (N=15 nuclei/line;  $p > 0.05$ ; Student's t-test). Error bars show standard error. a.u., arbitrary units; n.s. non-significant; S.E.M. standard error of measurement.

**Figure S2: Additional *CYCD7;1* T-DNA insertional alleles and mutant phenotypes**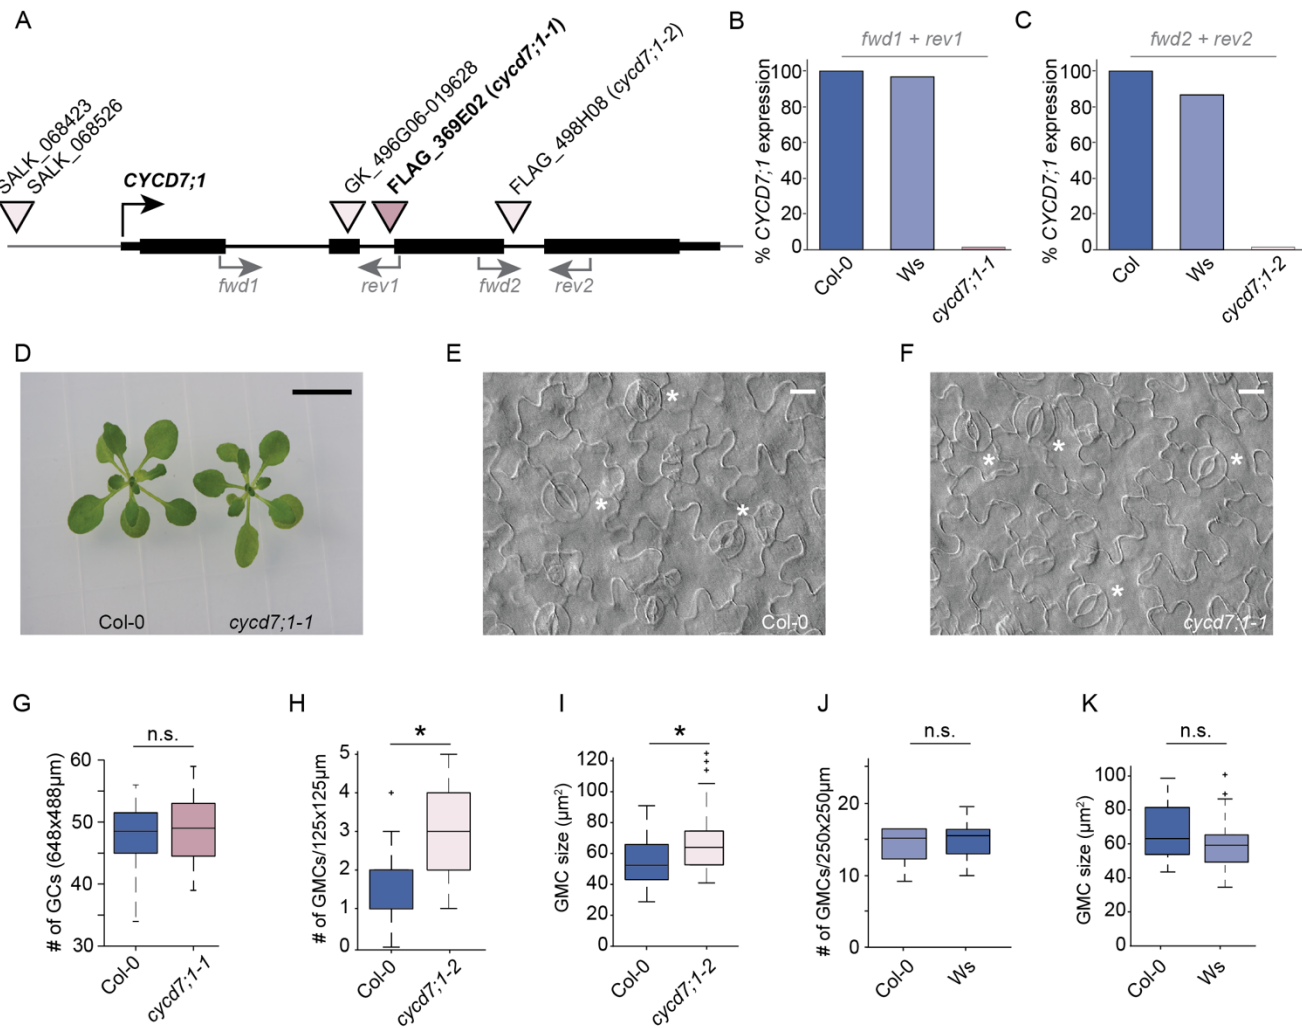

**(A)** Schematic drawing of *CYCD7;1* gene structure with available T-DNA insertion lines and their insertion sites. Black boxes indicate exons. Gray arrowheads marked with *fwd* and *rev* show primer binding sites for qPCR. **(B)** qPCR of *CYCD7;1* expression in wild type (Col-0 and Ws) and the *cycd7;1-1* mutant. Primer binding sites are shown in (A). **(C)** qPCR of *CYCD7;1* expression in wild type (Col-0 and Ws) and the *cycd7;1-2* mutant. Primer binding sites are shown in (A). **(D)** Wild type and *cycd7;1-1* mutant seedlings at 14 dag. **(E)** Wild type cotyledon with mature GCs, labeled with black asterisks at 7 dag. **(F)** Cotyledon of *cycd7;1-1* mutant with mature GCs, labeled with black asterisks, images were taken at 7 dag. **(G)** Quantification of GCs in wild type and *cycd7;1-1* mutants at 5 dag on the abaxial side of cotyledons (N=12 cotyledons for each genotype). Difference between the wild type and *cycd7;1-1* is not significant (p-value = 0.8169; Mann-Whitney U test). **(H)** Quantification of the number of GMCs in wild type and *cycd7;1-2* cotyledons at 4 dag. Asterisk indicates significant difference (p-value = 0.0031; Mann-Whitney U test). **(I)** Quantification of GMC area in wild type (N=29) and *cycd7;1-2* (N=46) cotyledons at 4 dag. Asterisk indicates significant difference (p-value = 0.0053; Mann-Whitney U test). **(J)** Quantification of the number of GMCs in Col-0 wild type and Ws wild type cotyledons at 4 dag. Difference is not significant (p-value = 0.6970; Mann-Whitney U test). **(K)** Quantification of GMC area in Col-0 wild type (N=22) and Ws wild type (N=45) cotyledons at 4 dag. Difference is not significant (p-value = 0.2295; Mann-Whitney U test).

Center lines show the medians; box limits indicate the 25th and 75th percentiles; whiskers extend 2.5 times the interquartile range from the 97.5th percentile. Scale bar 1 cm in (C) and 20  $\mu$ M in (E and F). Note that stomatal production is dynamic and is sensitive to exact age and growth conditions (e.g. media, light, temperature). Therefore, all quantitative measurements were performed with wildtype controls grown side-by-side with mutants under the exact same conditions to enable comparisons.

**Figure S3: ChIP-seq profiles of FAMA and SPCH on selected loci**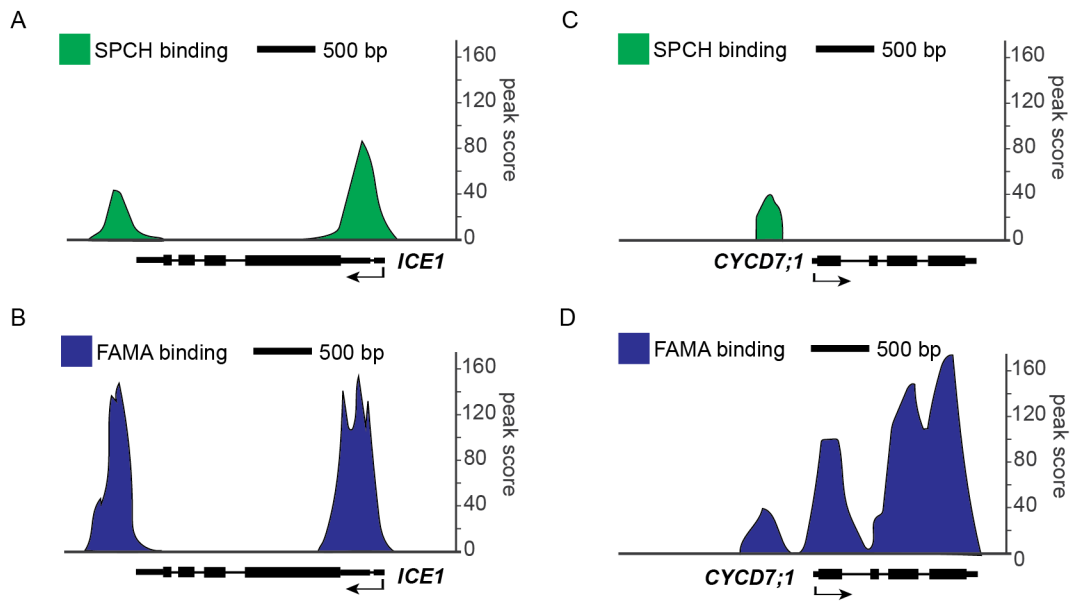

ChIP-Seq profile of SPCH (green) and FAMA (blue) binding to the promoter and gene body of *ICE1* and *CYCD7;1*, respectively. The y-axis is the output peak score from MACS2 (in arbitrary units). *ICE1* was previously demonstrated to be a direct SPCH target (Lau et al., 2014) and serves as a reference to provide intuition about the meaning of these peak score values. Black arrow indicates gene orientation and transcriptional start sites. The profile in (D) is replicated from Fig. 5G to enable a more convenient comparison among transcription factors and targets.

**Figure S4: Evidence that FAMA represses *CYCD7;1* in GMCs**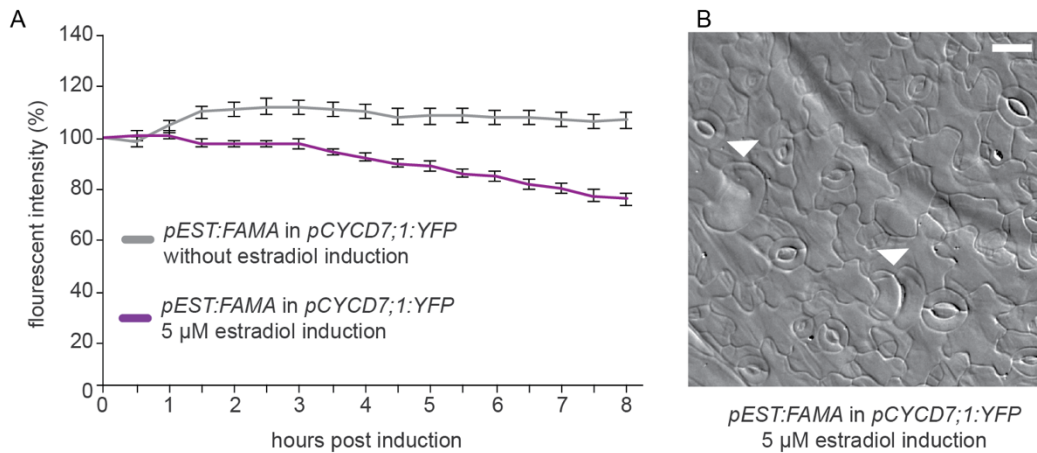

**(A)** Transgenic plants expressing *proCYCD7;1:YFP* were subjected to FAMA induction and the fluorescence intensity of YFP was monitored over time in cotyledon GMCs. Four-day old plants treated with 5  $\mu$ M  $\beta$ -estradiol show ~25% reduction in YFP fluorescence as compared to the control treatment in an 8-hour imaging period suggesting that FAMA represses *CYCD7;1*. Error bars represent standard error.

**(B)** DIC image of the epidermis of a 10 day cotyledon from genotypically identical siblings of the plants monitored in (A) grown on media supplemented with 50  $\mu$ M  $\beta$ -estradiol. The plant demonstrates the typical FAMA overexpression phenotype of ectopic unpaired (kidney shaped) GCs. Scale bar is 25  $\mu$ m.



**Table S1: Primers used in this study.**

|                                       | Forward primer (5'-3')               | Reverse primer                       |
|---------------------------------------|--------------------------------------|--------------------------------------|
| CYCD7 genomic region (promoter + CDS) | CACCGAGAAACTATAGTAGAAGGAAAC          | AATGTAATTTGACATTCAATTG               |
| CYCD7;1 <sup>LGK</sup> genomic        | TAATCTACTCGGAGAAAAATCTTGGCCCGCGAGTCC | CTCGCGGGCCAAGATTTTCTCCGAGTAG ATTATCC |
| CYCD7;1 promoter                      | CACCGAGAAACTATAGTAGAAGGAAAC          | GCGGCCGCTTGAAACTGAACCGGTTT           |
| CYCD7;1 genomic                       | CACCATGGATAATCTACTCTGCGAAG           | AATGTAATTTGACATTCAATTG               |
| CYCD7;1 <sup>LGK</sup> genomic        | CACCATGGATAATCTACTCTGCGAAG           | AATGTAATTTGACATTCAATTG               |
| CYCD7;1 qPCR (fwd1 and rev1)          | TCCATGCGTTTCAATGGCTAATCC             | TCCACCATCCAATTCGTCCATTCC             |
| CYCD7;1 qPCR (fwd2 and rev2)          | GTGTGAACGCGGTTACGAG                  | TGAAGCATTTTAAATCGCATATAACA           |
| ACTIN qPCR                            | CAAGGCCGAGTATG                       | GAAACGCAGACGTA                       |
| <i>cyd7;1-1</i> RB T-DNA              | CCAGACTGAATGCCACAGGCCGTC             |                                      |
| CYCD7;1                               | ATGGATAATCTACTCTGCGA                 | AATGTAATTTGACATTCAATTG               |

## Supplemental Material and Methods

### **Time-lapse of estradiol inducible constructs**

Estradiol inducible FAMA (*proEST:FAMA*) was transformed into plants harboring *proCYCD7;1:YFP* and 4 dag T3 plants were used for time-lapse experiments following general protocols described in (Davies and Bergmann, 2014), except that that normal media (1/4 strengths MS, 0.75% Sucrose) was supplemented with 5 $\mu$ M  $\beta$ -estradiol (25 $\mu$ L of 10mM  $\beta$ -estradiol dissolved in 95% ethanol for 50mL media) or ethanol alone (25 $\mu$ L 95% ethanol for 50mL media), and pumped through the chamber with a constant flow at 2mL/hour using a syringe pump. Z-stacks through the epidermis were captured on a confocal microscope with Leica software every 30 min for 8 hours. Fiji software was used to measure Integrated Density (total fluorescence) of 36 (control) or 28 (estradiol-treated) GMC nuclei. % fluorescence per nucleus was calculated with respect to “initiation” time point (T0). Three independent replicates of the time course were performed, each on a separate plant, for both control and induced lines, and the averaged data plotted in Fig S4.
